# Supplementary material for: A SHATTERPROOF-like gene controls ripening in non-climacteric strawberries, and auxin and abscisic acid antagonistically affect its expression
Source: PubMed Central journal article supplement — J Exp Bot. 2013 Aug 14;64(12):3775–86. doi: 10.1093/jxb/ert214 (PMC3745736; doi:10.1093/jxb/ert214), 2013-08-14
Supplement: supp_ert214_jexbot100719_file001.pdf [file supp_ert214_jexbot100719_file001.pdf]

## **SUPPLEMENTARY DATA**

**Manuscript title:** A *SHATTERPROOF*-like gene controls ripening in the non-climacteric strawberries, and auxin and abscissic acid antagonistically affect its expression.

**Authors:** Margherita Daminato, Flavia Guzzo, Giorgio Casadoro

### **Supplementary File 1**

#### **Supplementary materials and methods: metabolomics analysis**

The liquid nitrogen frozen fruits were powdered and extracted with three volumes of ice cold methanol, sonicated at 40 kHz for 15 min in an ultrasonic bath (Falc Instruments, Bergamo, Italy) at room temperature, centrifuged for 10 min at 16,000g at 4°C and filtered through 0.2 µm pore filters. The samples were diluted with 1:1 (v:v) LC-MS grade water (SIGMA) just before the chromatographic analysis. The extracts were analyzed by reversed phase HPLC-ESI-MS (High Performance Liquid Chromatography-Electrospray Ionization-Mass Spectrometry) in negative ionization mode.

The extracts were analyzed by reversed phase HPLC-ESI-MS in negative ionization mode, using a Beckman Coulter Gold 127 HPLC system (Beckman Coulter, Fullerton, CA) equipped with a C18 guard column (7.5 x 2.1 mm) and an analytical Alltima HP C18 column (150 x 2.1 mm, particle size 3µm) (Alltech Associates Inc, Deerfield, IL). Two solvents were used: 1% (v/v) formic acid, 5% (v/v) acetonitrile in water (solvent A), and 100% acetonitrile (solvent B). A solvent gradient was established from 0 to 10% B in 5 min, from 10 to 20% B in 20 min, from 20 to 25% B in 5 min, and from 25 to 70% B in 15 min, followed by 10 min of 70% acetonitrile isocratic phase. Four untreated fruits, four fruits agro-infiltrated with the pBINplus\_intron construct, seven fruits FaSHP up-regulated, eight FaSHP down-regulated,

three pools of either ABA or NAA treated fruits plus three untreated controls were chosen and analyzed in duplicate, with a 20  $\mu$ l injection volume and 20 min equilibration between samples. The flow rate was 200  $\mu$ l min<sup>-1</sup>. The HPLC system was coupled on-line with a Bruker ion trap mass spectrometer Esquire 6000, equipped with an electrospray ionization (ESI) source. MS data were collected using the Bruker Daltonics Esquire 5.2- Esquire Control 5.2 software, and processed using the Bruker Daltonics Esquire 5.2-Data Analysis 3.2 software (Bruker Daltonik GmbH, Bremen, Germany). The alternate mass spectra were recorded in the range 50–3000 m/z (full scan mode, 13,000 m/z s<sup>-1</sup>). For the fragmentation pattern analysis, MS/MS and MS<sup>3</sup> spectra were recorded in negative and positive mode in the range 50–3000 m/z, with the fragmentation amplitude set at 1 V. Nitrogen was used as the nebulizing gas (50 psi, 350°C) and drying gas (10 l min<sup>-1</sup>). Helium was used as the collision gas. The vacuum pressure was 1.4 x10<sup>-5</sup> mbar. Additional parameters were: capillary source, +4000 V; end plate offset -500 V; skimmer: -40 V; cap exit -121 V; Oct 1 DC: -12 V; Oct 2 DC: -1.70 V; lens 1: 5 V; lens 2: 60 V.

Metabolites were identified through the comparison of m/z, retention time and fragmentation pattern with those of authentic standards and, when authentic standards were not available, comparing m/z and fragmentation patterns with those reported in the literature. Chromatogram data extraction and alignment were carried out using MZmine software (<http://mzmine.sourceforge.net>).

Since internal standards were not applied, the relative quantitation (i.e. comparison between samples) was based on the area of each of the signals extracted from the chromatograms and expressed as intensity in arbitrary units.

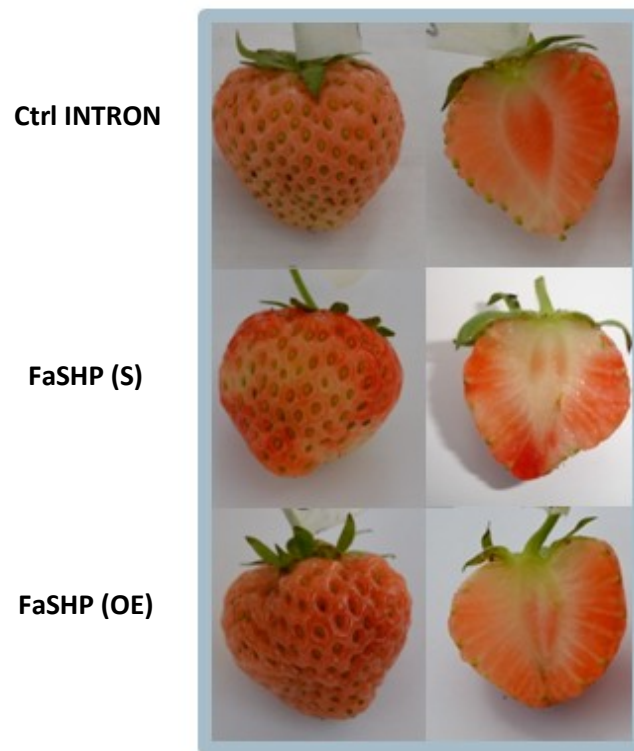

**Figure S1.** Phenotype of agro-injected fruits harvested at the pink stage. (Ctrl INTRON): fruit injected with the control construct. [FaSHP (S)]: fruit injected with the RNA interference construct (pBINplus\_FaSHPi). [FaSHP (OE)]: fruit injected with the over-expression construct (pBinAR\_FaSHP).

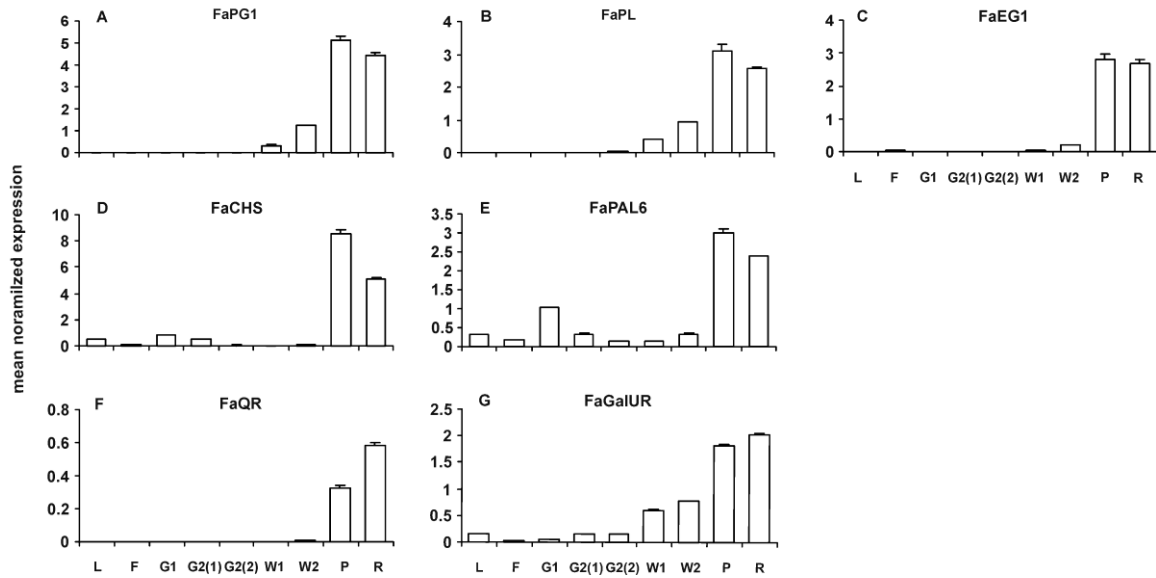

**Figure S2.** Relative expression profiles of ripening-related genes in leaf (L), flower (F), and fruits at different developmental stages: small green (G1), large green [G2(1)], large green with enlarged achenes [G2(2)], white with green achenes (W1), white with brown achenes (W2), pink (P) and red (R). [*FaPG1*, polygalacturonase; *FaPL*, pectate lyase; *FaEG1*, endo-beta-1,4-glucanase; *FaCHS*, chalcone synthase; *FaPAL6*, phenylalanine ammonia lyase, *FaQR*, quinone oxidoreductase; *FaGalUR*, D-galacturonate reductase].

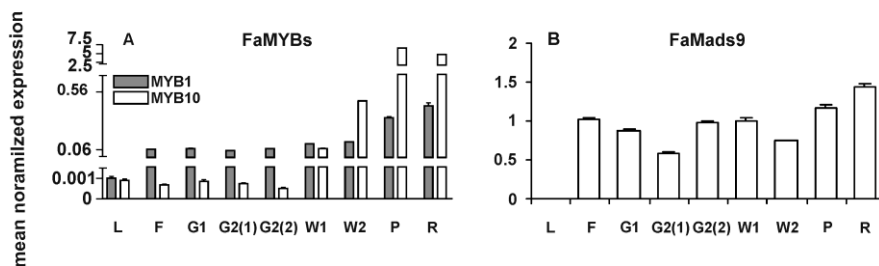

**Figure S3.** Relative expression profiles of transcription factor encoding genes in leaf (L), flower (F), and fruits at different developmental stages: small green (G1), large green [G2(1)], large green with enlarged achenes [G2(2)], white with green achenes (W1), white with brown achenes (W2), pink (P) and red (R).

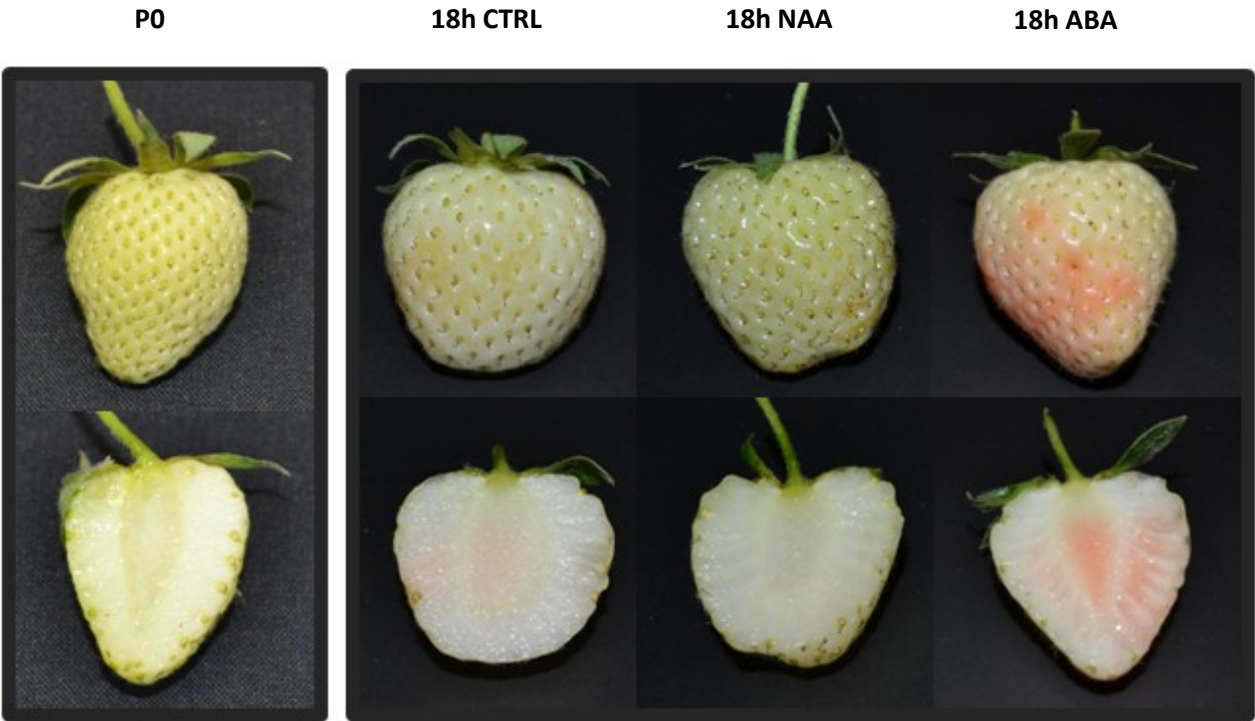

**Figure S4.** Phenotype of hormone treated white fruits. (P0) Fruit at the beginning of the treatment. (18h CTRL) Fruit sprayed with the control solution: a faint pink color can be seen in the central part of the fruit. (18h NAA) Fruit sprayed with the NAA solution: the fruit is completely white. (18h ABA) Fruits sprayed with the ABA solution have acquired a distinct pinkish color.

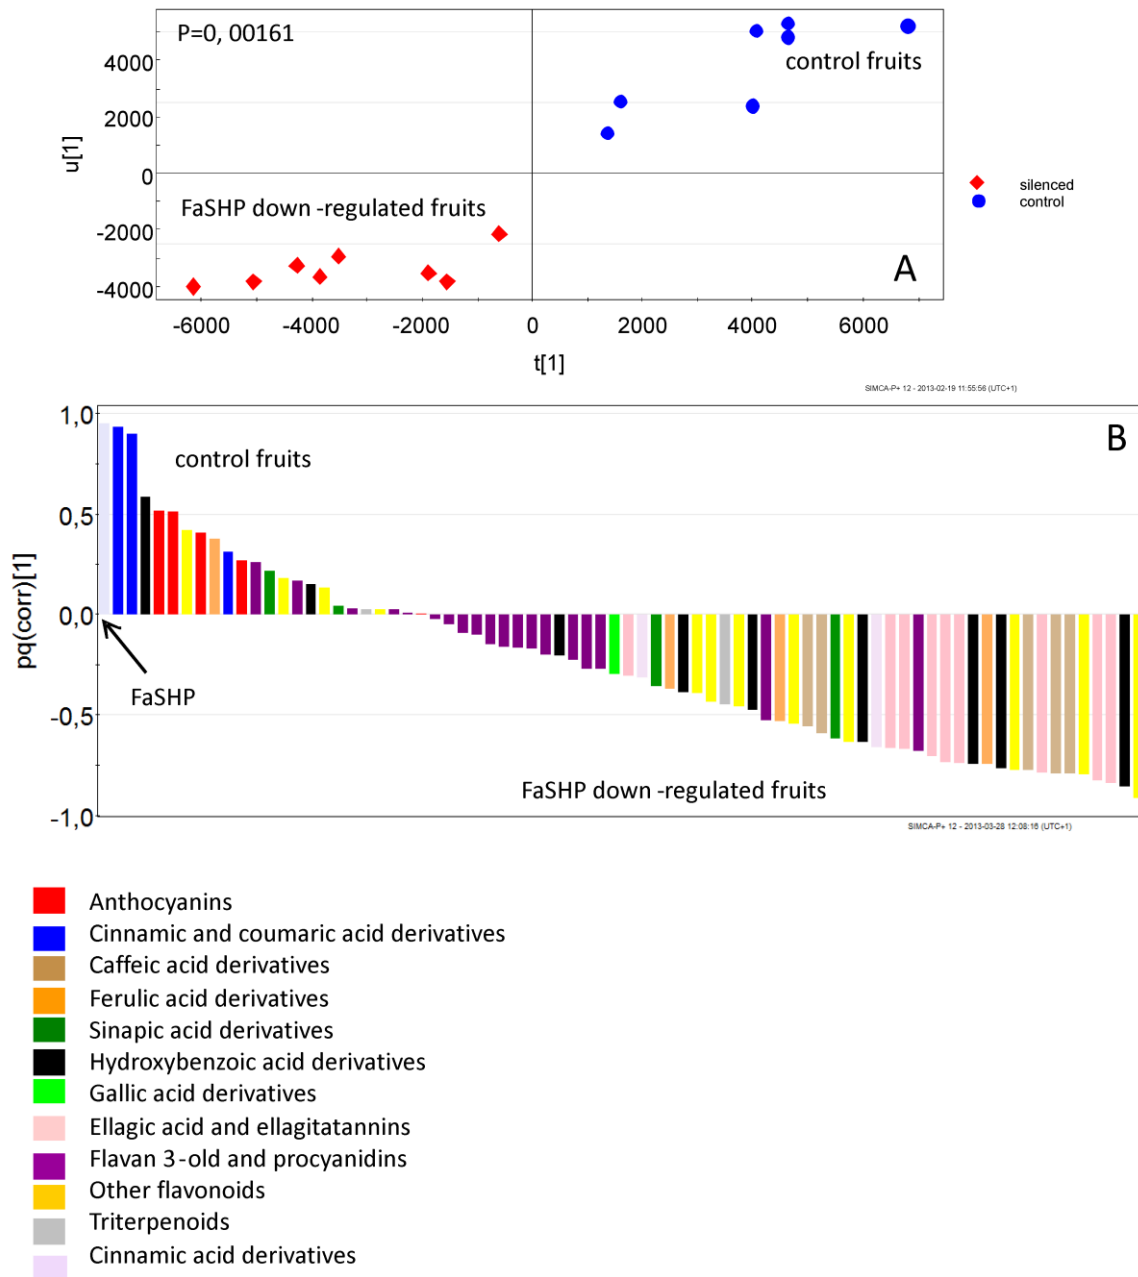

**Figure S5.** OPLS analysis of *FaSHP* down regulated and control fruits (either untreated fruits or fruits agroinfiltrated with the pBINplus\_intron construct; one of the control agroinfiltrated fruit has been removed as outlier); variable Y: mean normalized *FaSHP* expression; variables X: HPLC-ESI-MS quantified metabolites. A:  $t_1$ - $u_1$  score plot; B:  $pq(corr)_1$  (correlation between  $t$ , the metabolite content, and  $u$ , the gene expression) loading plot, showing the contribution of the various metabolites on the linear gene expression-metabolite function shown in the score plot.

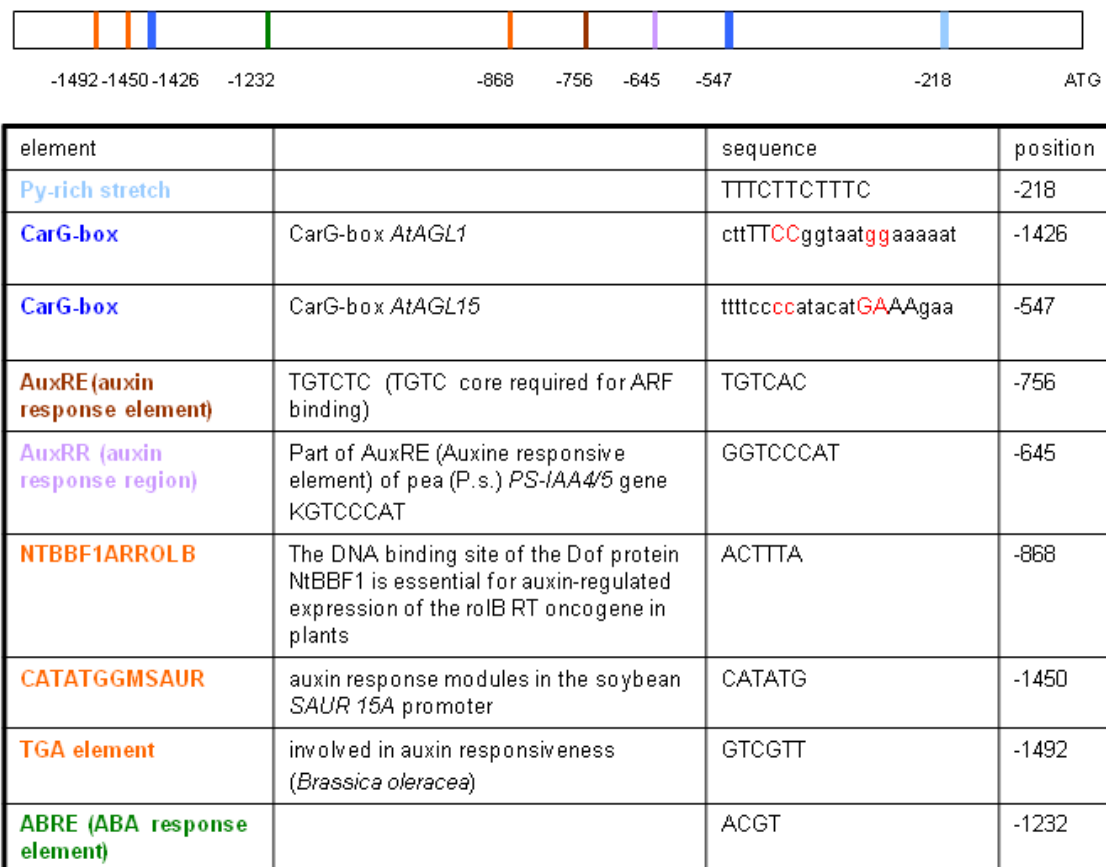

**Figure S6.** Bioinformatic analysis of the *FaSHP* gene promoter. The position of the indicated cis-acting element is expressed relative to ATG codon.

| m/z (-) | m/z(+) | rt (min) | ms/ms        |       | ms3   |       | putative identification           |
|---------|--------|----------|--------------|-------|-------|-------|-----------------------------------|
|         |        |          | m/z          | I (%) | m/z   | I (%) |                                   |
| 430,94  |        | 17,3     | <b>268.8</b> | 100.0 | 146.7 | 100.0 | pelargonidin 3-O-glucoside        |
|         |        |          | 269.5        | 15.1  | 240.8 | 21.0  |                                   |
|         |        |          | 146.7        | 4.0   | 224.8 | 14.2  |                                   |
|         |        |          |              |       | 147.8 | 12.6  |                                   |
| 472,87  |        | 22,5     | <b>268.8</b> | 100.0 | 146.7 | 100.0 | pelargonidin-3-O-acetylglucoside  |
|         |        |          | 269.7        | 19.0  |       |       |                                   |
| 446,92  |        | 15,9     | <b>284.7</b> | 100.0 | 256.7 | 100.0 | cyanidin 3-O-glucoside            |
|         |        |          | 285.5        | 13.0  | 240.8 | 95.3  |                                   |
|         |        |          |              |       | 198.7 | 89.8  |                                   |
|         |        |          |              |       | 216.8 | 83.9  |                                   |
|         |        |          |              |       | 162.7 | 69.9  |                                   |
|         | 534,90 | 30,3     | 287.0        | 100.0 |       |       | cyanidin-3-O-malonylglucoside     |
|         |        |          | 288.0        | 9.6   |       |       |                                   |
|         | 518,99 | 22,5     | <b>271.0</b> | 100.0 | 121.0 | 100.0 |                                   |
|         |        |          | 271.8        | 13.7  | 197.0 | 55.7  | pelargonidin-3-O-malonylglucoside |
|         |        |          |              |       | 145.1 | 46.8  |                                   |
|         |        |          |              |       | 224.9 | 40.5  |                                   |
|         |        |          |              |       | 169.1 | 36.4  |                                   |
|         |        |          |              |       | 173.0 | 36.2  |                                   |
|         |        |          |              |       | 215.0 | 31.2  |                                   |
|         |        |          |              |       | 186.8 | 29.1  |                                   |
| 486,90  |        | 20,8     | <b>440.9</b> | 100.0 | 292.8 | 100,0 | cinnamoyl desoxyhexose d, fa      |
|         |        |          | 292.8        | 15.3  | 146.7 | 57.4  |                                   |
|         |        |          | 146.7        | 11.8  |       |       |                                   |



|        |  |      |              |       |       |       |                       |
|--------|--|------|--------------|-------|-------|-------|-----------------------|
| 308,95 |  | 21,7 | <b>146.8</b> | 100.0 |       |       | cinnamoyl O-hexose    |
| 324,86 |  | 12,1 | 144.8        | 100.0 | 118.8 | 100.0 | coumaric acid hexose  |
|        |  |      | <b>162.8</b> | 87.8  |       |       |                       |
|        |  |      | 288.8        | 33.5  |       |       |                       |
|        |  |      | 186.7        | 31.4  |       |       |                       |
|        |  |      | 118.9        | 10.7  |       |       |                       |
|        |  |      | 204.7        | 7.8   |       |       |                       |
|        |  |      | 116.9        | 7.7   |       |       |                       |
|        |  |      | 264.8        | 7.1   |       |       |                       |
|        |  |      | 234.8        | 6.2   |       |       |                       |
|        |  |      | 163.7        | 5.7   |       |       |                       |
|        |  |      | 145.8        | 4.8   |       |       |                       |
|        |  |      | 187.8        | 3.7   |       |       |                       |
|        |  |      | 265.8        | 2.8   |       |       |                       |
|        |  |      | 158.8        | 2.6   |       |       |                       |
|        |  |      | 160.8        | 2.5   |       |       |                       |
|        |  |      | 216.8        | 2.2   |       |       |                       |
|        |  |      | 172.7        | 1.8   |       |       |                       |
|        |  |      | 289.8        | 1.6   |       |       |                       |
|        |  |      | 119.8        | 1.5   |       |       |                       |
| 336,96 |  | 16,0 | <b>190.7</b> | 100.0 |       |       | coumaroyl quinic acid |
|        |  |      | 191.7        | 6.8   |       |       |                       |
|        |  |      | 162.8        | 4.4   |       |       |                       |
| 324,95 |  | 18,0 | <b>162.7</b> | 100.0 |       |       | coumaric acid hexose  |
|        |  |      | 118.8        | 83.1  |       |       |                       |
|        |  |      | 160.7        | 49.1  |       |       |                       |
| 340,93 |  | 7,7  |              |       |       |       | caffeic acid hexose   |

|        |  |      |              |       |       |       |                       |
|--------|--|------|--------------|-------|-------|-------|-----------------------|
|        |  |      | <b>178.7</b> | 100.0 | 134.8 | 100.0 |                       |
|        |  |      | 160.8        | 42.1  |       |       |                       |
|        |  |      | 134.8        | 19.4  |       |       |                       |
|        |  |      | 179.7        | 9.8   |       |       |                       |
|        |  |      | 202.7        | 5.9   |       |       |                       |
|        |  |      | 132.8        | 3.6   |       |       |                       |
| 340,87 |  | 11,9 | <b>178.7</b> | 100.0 | 134.8 | 100.0 | caffeic acid hexose   |
|        |  |      | 134.8        | 25.7  |       |       |                       |
|        |  |      | 179.7        | 9.3   |       |       |                       |
| 352,86 |  | 12,4 | <b>190.7</b> | 100.0 | 84.9  | 100.0 | caffeoyl quinic acid  |
|        |  |      | 191.7        | 6.7   |       |       |                       |
|        |  |      | 178.9        | 3.1   |       |       |                       |
| 520,99 |  | 24,6 | 326.9        | 100.0 | 326.9 | 100.0 | caffeic acid hexose d |
|        |  |      | <b>472.9</b> | 90.2  | 340.9 | 16.5  |                       |
|        |  |      | 178.7        | 66.7  |       |       |                       |
|        |  |      | 340.9        | 50.0  |       |       |                       |
| 566,88 |  | 25,9 | 520.7        | 100.0 | 178.8 | 100,0 | caffeic acid d fa     |
|        |  |      | 178.7        | 49.9  | 160.6 | 27,0  |                       |
| 354,96 |  | 14,1 | <b>192.8</b> | 100.0 | 133.8 | 100.0 | ferulic acid hexose   |
|        |  |      | 216.7        | 72.3  | 148.8 | 34.7  |                       |
|        |  |      | 174.8        | 53.2  |       |       |                       |
|        |  |      | 133.8        | 11.9  |       |       |                       |
|        |  |      | 159.9        | 11.3  |       |       |                       |
|        |  |      | 234.8        | 7.5   |       |       |                       |
|        |  |      | 193.8        | 7.2   |       |       |                       |
|        |  |      | 201.7        | 4.8   |       |       |                       |
|        |  |      | 294.8        | 4.8   |       |       |                       |

|        |  |      |              |       |       |       |                        |
|--------|--|------|--------------|-------|-------|-------|------------------------|
| 516,92 |  | 16,8 | <b>192.7</b> | 100.0 | 133.7 | 100,0 | ferulic acid hexose d  |
|        |  |      | 174.8        | 67.0  | 148.8 | 81.3  |                        |
|        |  |      | 234.8        | 41.3  |       |       |                        |
|        |  |      | 294.8        | 27.4  |       |       |                        |
|        |  |      | 336.8        | 22.1  |       |       |                        |
|        |  |      | 264.8        | 21.6  |       |       |                        |
|        |  |      | 159.7        | 12.5  |       |       |                        |
| 536,96 |  | 17,9 | <b>178.7</b> | 100.0 | 130.7 | 100.0 | dihydroferulic acid d  |
|        |  |      | 356.8        | 80.3  | 96.9  | 93.1  |                        |
|        |  |      | 354.8        | 52.0  | 88.9  | 69.0  |                        |
|        |  |      | 194.9        | 26.6  | 148.8 | 69.0  |                        |
|        |  |      | 324.9        | 24.6  | 142.7 | 37.9  |                        |
|        |  |      | 160.8        | 20.3  |       |       |                        |
| 448,93 |  | 18,3 | <b>354.8</b> | 100.0 | 192.7 | 100.0 | ferulic acid hexose d  |
|        |  |      | 192.8        | 66.4  |       |       |                        |
|        |  |      | 268.8        | 59.4  |       |       |                        |
|        |  |      | 286.8        | 40.5  |       |       |                        |
|        |  |      | 355.7        | 18.3  |       |       |                        |
|        |  |      | 328.8        | 16.5  |       |       |                        |
|        |  |      | 148.7        | 15.8  |       |       |                        |
|        |  |      | 287.7        | 11.5  |       |       |                        |
|        |  |      | 164.8        | 8.3   |       |       |                        |
| 431,01 |  | 14,0 | <b>384.9</b> | 100.0 | 152.8 | 100.0 | sinapic acid hexose fa |
|        |  |      | 222.9        | 21.0  | 222.8 | 77.9  |                        |
|        |  |      | 152.9        | 16.2  |       |       |                        |

|        |  |      |              |       |       |       |                               |
|--------|--|------|--------------|-------|-------|-------|-------------------------------|
|        |  |      | 160.9        | 13.3  |       |       |                               |
|        |  |      | 204.9        | 10.6  |       |       |                               |
| 431,01 |  | 14,7 | <b>384.9</b> | 100.0 | 152.8 | 100.0 | sinapic acid hexose fa        |
|        |  |      | 222.8        | 19.6  | 204.8 | 96.9  |                               |
|        |  |      | 160.8        | 14.0  | 222.8 | 53.2  |                               |
|        |  |      | 204.9        | 9.3   |       |       |                               |
|        |  |      | 152.9        | 9.1   |       |       |                               |
|        |  |      | 381.0        | 5.4   |       |       |                               |
|        |  |      | 382.1        | 5.0   |       |       |                               |
| 384,96 |  | 15,1 | <b>222.8</b> | 100.0 | 207.7 | 1,0   | sinapic acid hexose           |
|        |  |      | 204.8        | 83.1  |       |       |                               |
|        |  |      | 246.7        | 50.5  |       |       |                               |
|        |  |      | 163.8        | 16.7  |       |       |                               |
| 402,97 |  | 21,8 | <b>222.8</b> | 100.0 | 178.8 | 100,0 | sinapic acid d                |
|        |  |      | 178.8        | 58.5  |       |       |                               |
| 314,91 |  | 4,9  | <b>152.7</b> | 100.0 | 108.8 | 100.0 | hdihydroxybenzoic acid hexose |
|        |  |      | 151.8        | 23.8  | 122.8 | 32.0  |                               |
|        |  |      | 107.9        | 11.1  |       |       |                               |
|        |  |      | 164.7        | 9.3   |       |       |                               |
|        |  |      | 108.8        | 9.1   |       |       |                               |
|        |  |      | 153.7        | 6.7   |       |       |                               |
|        |  |      | 162.7        | 5.9   |       |       |                               |
|        |  |      | 224.8        | 2.3   |       |       |                               |
|        |  |      | 176.6        | 1.9   |       |       |                               |
|        |  |      | 194.8        | 1.6   |       |       |                               |
|        |  |      | 206.7        | 1.5   |       |       |                               |
|        |  |      | 122.8        | 1.3   |       |       |                               |

|        |  |     |              |       |       |       |                               |
|--------|--|-----|--------------|-------|-------|-------|-------------------------------|
|        |  |     | 150.8        | 1.3   |       |       |                               |
| 314,91 |  | 6,7 | <b>152.7</b> | 100.0 | 134.7 | 100.0 | dihydroxybenzoic acid hexose  |
|        |  |     | 108.8        | 9.5   | 108.8 | 53.5  |                               |
|        |  |     | 153.7        | 6.3   | 122.9 | 23.3  |                               |
| 298,95 |  | 7,1 | 112.8        | 100.0 |       |       | hydroxybenzoic acid hexose    |
|        |  |     | 118.8        | 94.7  |       |       |                               |
|        |  |     | 178.8        | 76.6  |       |       |                               |
|        |  |     | 100.8        | 70.4  |       |       |                               |
|        |  |     | 142.8        | 66.7  |       |       |                               |
|        |  |     | 88.9         | 61.4  |       |       |                               |
|        |  |     | 160.8        | 57.6  |       |       |                               |
|        |  |     | 136.6        | 3.8   |       |       |                               |
| 344,93 |  | 7,1 | 298.8        | 100.0 | 118.8 | 100.0 | hydroxybenzoic acid hexose fa |
|        |  |     |              |       | 178.8 | 97.6  |                               |
|        |  |     |              |       | 112.8 | 76.8  |                               |
|        |  |     |              |       | 142.7 | 76.6  |                               |
|        |  |     |              |       | 160.7 | 68.5  |                               |
| 284,88 |  | 9,0 | <b>152.7</b> | 100.0 | 108.9 | 100.0 | dihydroxybenzoic acid pentose |
|        |  |     | 151.9        | 21.7  |       |       |                               |
|        |  |     | 107.9        | 9.7   |       |       |                               |
|        |  |     | 108.9        | 8.5   |       |       |                               |
|        |  |     | 153.7        | 4.8   |       |       |                               |
|        |  |     | 164.7        | 4.1   |       |       |                               |
|        |  |     | 162.6        | 3.2   |       |       |                               |
|        |  |     | 178.7        | 2.3   |       |       |                               |
| 298,90 |  | 9,2 | <b>136.8</b> | 100.0 | 92.9  | 100.0 | hydroxybenzoyl hexose         |
|        |  |     | 137.7        | 3.7   |       |       |                               |

|        |      |              |       |              |       |                       |
|--------|------|--------------|-------|--------------|-------|-----------------------|
| 330,90 | 20,5 | <b>136.8</b> | 100.0 | 108.7        | 100.0 | hydroxybenzoic acid d |
|        |      | 286.8        | 50.9  |              |       |                       |
|        |      | 270.8        | 31.4  |              |       |                       |
|        |      | 312.8        | 27.3  |              |       |                       |
|        |      | 288.8        | 13.8  |              |       |                       |
|        |      | 268.8        | 9.5   |              |       |                       |
|        |      | 244.9        | 9.0   |              |       |                       |
|        |      | 313.8        | 6.2   |              |       |                       |
|        |      | 124.8        | 6.2   |              |       |                       |
|        |      | 287.8        | 6.1   |              |       |                       |
|        |      | 228.8        | 5.5   |              |       |                       |
|        |      | 108.9        | 4.4   |              |       |                       |
|        |      | 262,89       | 31,1  | <b>152.8</b> | 100.0 |                       |
|        |      | 218.8        | 44.8  |              |       |                       |
| 543,02 | 42,5 | <b>335.0</b> | 100.0 | 98.9         | 100.0 | vanillic acid d, fa   |
|        |      |              |       | 180.6        | 71.5  |                       |
|        |      |              |       | 136.8        | 70.7  |                       |
|        |      |              |       | 166.8        | 45.5  |                       |
|        |      |              |       | 202.9        | 43.9  |                       |
|        |      |              |       | 167.7        | 42.3  |                       |
|        |      |              |       | 162.9        | 41.5  |                       |
|        |      |              |       | 96.8         | 27.6  |                       |
|        |      |              |       | 317.8        | 19.5  |                       |
|        |      |              |       | 150.7        | 17.1  |                       |
|        |      |              |       | 264.9        | 13.0  |                       |
| 300,89 | 5,9  | <b>167.7</b> | 100.0 | 149.7        | 100.0 | gallic acid pentose   |

|        |  |     |              |       |       |       |                     |
|--------|--|-----|--------------|-------|-------|-------|---------------------|
|        |  |     | 168.7        | 81.3  | 150.7 | 25.1  |                     |
|        |  |     | 282.7        | 39.4  |       |       |                     |
|        |  |     | 124.8        | 26.3  |       |       |                     |
|        |  |     | 283.7        | 15.3  |       |       |                     |
|        |  |     | 149.8        | 13.3  |       |       |                     |
|        |  |     | 166.9        | 8.6   |       |       |                     |
|        |  |     | 150.7        | 8.3   |       |       |                     |
|        |  |     | 169.7        | 7.1   |       |       |                     |
| 864,84 |  | 3,8 | <b>694.9</b> | 100.0 | 242.6 | 100,0 | procyanidin P3 type |
|        |  |     | 576.8        | 28.0  | 288.9 | 16.9  |                     |
|        |  |     | 286.8        | 27.7  |       |       |                     |
|        |  |     | 695.7        | 24.4  |       |       |                     |
|        |  |     | 574.9        | 20.2  |       |       |                     |
|        |  |     | 404.8        | 15.7  |       |       |                     |
|        |  |     | 542.9        | 14.9  |       |       |                     |
| 576,94 |  | 9,7 | <b>424.9</b> | 100.0 | 406.8 | 100.0 | procyanidin P2 type |
|        |  |     | 406.9        | 89.6  | 407.4 | 20.6  |                     |
|        |  |     | 288.9        | 35.3  | 272.9 | 8.2   |                     |
|        |  |     | 450.8        | 29.6  | 380.9 | 7.0   |                     |
|        |  |     | 407.8        | 22.9  | 228.8 | 2.7   |                     |
|        |  |     | 425.6        | 12.3  | 338.9 | 2.6   |                     |
|        |  |     | 286.9        | 9.1   | 150.7 | 2.2   |                     |
|        |  |     | 244.8        | 8.5   | 273.8 | 2.2   |                     |
|        |  |     | 272.8        | 7.8   | 280.8 | 2.0   |                     |
| 864,86 |  | 9,8 | <b>694.9</b> | 100.0 | 542.8 | 100.0 | procyanidin P3 type |
|        |  |     | 286.8        | 89.1  | 406.8 | 50.9  |                     |
|        |  |     | 576.8        | 54.5  | 524.8 | 50.0  |                     |

|         |  |      |              |       |       |       |                      |
|---------|--|------|--------------|-------|-------|-------|----------------------|
|         |  |      | 406.8        | 52.4  | 242.9 | 41.7  |                      |
|         |  |      | 448.7        | 35.0  | 462.8 | 35.2  |                      |
|         |  |      | 424.9        | 32.9  | 677.1 | 26.9  |                      |
|         |  |      | 542.9        | 32.5  | 254.8 | 16.7  |                      |
|         |  |      | 712.8        | 29.2  | 450.9 | 15.7  |                      |
|         |  |      | 739.0        | 26.9  | 288.7 | 14.8  |                      |
|         |  |      | 450.7        | 26.0  | 404.7 | 13.9  |                      |
|         |  |      | 577.8        | 21.8  | 362.8 | 13.0  |                      |
|         |  |      | 695.9        | 21.1  | 346.8 | 10.2  |                      |
|         |  |      | 413.0        | 18.3  | 293.7 | 9.3   |                      |
|         |  |      | 574.8        | 18.1  | 584.4 | 9.3   |                      |
| 864,88  |  | 10,9 | <b>694.9</b> | 100.0 | 242.7 | 100.0 | procyanidin P3 type  |
|         |  |      | 406.9        | 75.6  | 542.8 | 50.6  |                      |
|         |  |      | 576.8        | 58.6  | 524.8 | 25.9  |                      |
|         |  |      | 286.9        | 51.6  | 677.9 | 22.2  |                      |
|         |  |      | 738.8        | 51.3  | 404.8 | 19.8  |                      |
|         |  |      | 448.9        | 48.7  | 499.0 | 12.3  |                      |
|         |  |      | 450.9        | 42.2  | 450.8 | 11.7  |                      |
|         |  |      | 574.8        | 42.2  | 544.3 | 11.7  |                      |
|         |  |      | 288.9        | 38.8  | 204.7 | 8.6   |                      |
|         |  |      | 404.9        | 34.6  | 677.0 | 8.6   |                      |
| 1152,82 |  | 12,0 | 1027.1       | 100.0 |       |       | Procyanidin tetramer |
|         |  |      | 406.7        | 55.6  |       |       |                      |
|         |  |      | 694.9        | 54.3  |       |       |                      |
|         |  |      | 1027.9       | 43.2  |       |       |                      |
|         |  |      | 737.0        | 39.5  |       |       |                      |
|         |  |      | 982.7        | 37.0  |       |       |                      |



|         |  |      |              |       |       |       |                      |
|---------|--|------|--------------|-------|-------|-------|----------------------|
|         |  |      | 983.1        | 32.1  |       |       |                      |
|         |  |      | 448.8        | 30.9  |       |       |                      |
|         |  |      | 576.8        | 25.9  |       |       |                      |
|         |  |      | 865.0        | 23.5  |       |       |                      |
| 288,88  |  | 12,0 | <b>244.8</b> | 100.0 | 202.8 | 100.0 | catechin             |
|         |  |      | 204.8        | 35.9  | 187.8 | 26.6  |                      |
|         |  |      | 178.8        | 16.2  | 186.8 | 24.6  |                      |
|         |  |      | 245.7        | 10.8  | 226.7 | 21.8  |                      |
|         |  |      | 202.9        | 10.0  | 160.8 | 19.0  |                      |
|         |  |      | 164.9        | 6.9   | 174.8 | 11.8  |                      |
|         |  |      | 136.9        | 6.6   | 161.7 | 8.4   |                      |
|         |  |      | 160.9        | 5.6   | 203.7 | 6.5   |                      |
|         |  |      | 230.8        | 5.5   | 230.8 | 5.5   |                      |
|         |  |      | 124.9        | 5.5   |       |       |                      |
| 864,87  |  | 12,7 | <b>694.9</b> | 100.0 | 288.9 | 100.0 | procaynidin P3 type  |
|         |  |      | 576.9        | 76.1  | 242.3 | 88.7  |                      |
|         |  |      | 286.9        | 68.5  |       |       |                      |
|         |  |      | 406.9        | 68.3  |       |       |                      |
|         |  |      | 424.9        | 45.1  |       |       |                      |
|         |  |      | 574.9        | 43.4  |       |       |                      |
|         |  |      | 738.9        | 34.7  |       |       |                      |
| 1152,84 |  | 12,7 | <b>864.8</b> | 100.0 | 407.0 | 100.0 | Procyanidin tetramer |
|         |  |      | 983.8        | 97.3  |       |       |                      |
|         |  |      | 846.9        | 75.7  |       |       |                      |
|         |  |      | 982.8        | 71.2  |       |       |                      |
|         |  |      | 695.0        | 60.4  |       |       |                      |

|        |  |      |               |       |       |       |                                             |
|--------|--|------|---------------|-------|-------|-------|---------------------------------------------|
|        |  |      | 1026.9        | 55.9  |       |       |                                             |
|        |  |      | 1134.8        | 55.9  |       |       |                                             |
|        |  |      | 862.7         | 55.0  |       |       |                                             |
|        |  |      | 448.8         | 50.5  |       |       |                                             |
|        |  |      | 1000.8        | 47.7  |       |       |                                             |
| 576,78 |  | 13,3 | <b>424.8</b>  | 100.0 | 406.8 | 100.0 | procyanidin P2 type                         |
|        |  |      | 406.9         | 75.5  | 407.7 | 19.5  |                                             |
|        |  |      | 288.9         | 31.7  | 272.7 | 11.3  |                                             |
|        |  |      | 286.9         | 21.5  |       |       |                                             |
|        |  |      | 450.8         | 21.4  |       |       |                                             |
|        |  |      | 407.9         | 16.1  |       |       |                                             |
|        |  |      | 425.6         | 13.9  |       |       |                                             |
|        |  |      | 298.8         | 8.7   |       |       |                                             |
|        |  |      | 289.9         | 5.0   |       |       |                                             |
|        |  |      |               |       |       |       |                                             |
| 560,87 |  | 13,7 | <b>288.8</b>  | 100.0 | 244.8 | 100.0 | propelargonidin dimer (afzelechin-catechin) |
|        |  |      | 434.9         | 37.8  | 204.8 | 63.0  |                                             |
|        |  |      | 270.9         | 25.8  |       |       |                                             |
|        |  |      | 542.8         | 19.5  |       |       |                                             |
|        |  |      | 406.9         | 19.1  |       |       |                                             |
|        |  |      | 289.9         | 16.4  |       |       |                                             |
|        |  |      | 328.9         | 12.8  |       |       |                                             |
|        |  |      | 244.9         | 11.6  |       |       |                                             |
|        |  |      | 424.9         | 10.2  |       |       |                                             |
|        |  |      |               |       |       |       |                                             |
| 719,98 |  | 14,2 | <b>1152.8</b> | 100.0 |       |       | B-type procyanidin pentamer (M-2H)--/2      |
|        |  |      | 1151.9        | 83.4  |       |       |                                             |
|        |  |      | 862.9         | 70.7  |       |       |                                             |
|        |  |      | 864.9         | 69.2  |       |       |                                             |

|        |  |      |              |       |       |       |                                                                       |
|--------|--|------|--------------|-------|-------|-------|-----------------------------------------------------------------------|
|        |  |      | 1152.8       | 55.6  |       |       |                                                                       |
| 848,87 |  | 14,7 | 406.8        | 100.0 |       |       | B type procyanidin trimer (epi)afzelechin-(epi)catechin-(epi)catechin |
|        |  |      | 570.9        | 100.0 |       |       |                                                                       |
|        |  |      | 722.9        | 89.1  |       |       |                                                                       |
|        |  |      | 571.9        | 78.2  |       |       |                                                                       |
|        |  |      | 558.8        | 76.2  |       |       |                                                                       |
|        |  |      | 288.8        | 55.8  |       |       |                                                                       |
|        |  |      | 432.8        | 52.4  |       |       |                                                                       |
|        |  |      | 286.8        | 51.7  |       |       |                                                                       |
|        |  |      | 450.8        | 51.7  |       |       |                                                                       |
|        |  |      | 577.8        | 49.0  |       |       |                                                                       |
| 576,83 |  | 15,2 | <b>424.8</b> | 100.0 | 406.8 | 100.0 | procyanidin P2 type                                                   |
|        |  |      | 406.9        | 75.5  | 407.7 | 19.5  |                                                                       |
|        |  |      | 288.9        | 31.7  | 272.7 | 11.3  |                                                                       |
|        |  |      | 286.9        | 21.5  |       |       |                                                                       |
|        |  |      | 450.8        | 21.4  |       |       |                                                                       |
|        |  |      | 407.9        | 16.1  |       |       |                                                                       |
|        |  |      | 425.6        | 13.9  |       |       |                                                                       |
|        |  |      | 298.8        | 8.7   |       |       |                                                                       |
|        |  |      | 289.9        | 5.0   |       |       |                                                                       |
| 575,98 |  | 16,6 | 406.9        | 100.0 | 242.8 | 100.0 | procyanidin B type tetramer (M-2H)--/2 adduct                         |
|        |  |      | 288.9        | 98.0  | 280.7 | 52.2  |                                                                       |
|        |  |      | 424.8        | 70.1  |       |       |                                                                       |
|        |  |      | 286.8        | 46.2  |       |       |                                                                       |
|        |  |      | 490.9        | 42.1  |       |       |                                                                       |
|        |  |      | 499.8        | 39.7  |       |       |                                                                       |

|        |  |      |              |       |       |       |                     |
|--------|--|------|--------------|-------|-------|-------|---------------------|
|        |  |      | 1026.8       | 34.7  |       |       |                     |
|        |  |      | <b>405.9</b> | 34.5  |       |       |                     |
|        |  |      | 863.0        | 29.1  |       |       |                     |
|        |  |      | 864.8        | 27.1  |       |       |                     |
|        |  |      | 738.8        | 26.9  |       |       |                     |
| 864,87 |  | 17,2 | 406.8        | 100.0 |       |       | procyanidin P3 type |
|        |  |      | 694.9        | 93.9  |       |       |                     |
|        |  |      | 286.8        | 51.9  |       |       |                     |
|        |  |      | 576.9        | 45.0  |       |       |                     |
|        |  |      | 424.9        | 41.6  |       |       |                     |
|        |  |      | 574.8        | 36.2  |       |       |                     |
|        |  |      | 542.9        | 32.8  |       |       |                     |
|        |  |      | 696.0        | 27.9  |       |       |                     |
|        |  |      | 404.9        | 27.6  |       |       |                     |
|        |  |      | 719.7        | 27.1  |       |       |                     |
|        |  |      | 448.8        | 24.9  |       |       |                     |
| 576,86 |  | 18,6 | 424.9        | 100.0 | 406.8 | 100.0 | procyanidin P2 type |
|        |  |      | 406.8        | 78.3  | 272.7 | 20.2  |                     |
|        |  |      | 288.8        | 36.2  |       |       |                     |
|        |  |      | 286.9        | 33.8  |       |       |                     |
|        |  |      | 425.7        | 18.9  |       |       |                     |
|        |  |      | 450.8        | 18.6  |       |       |                     |
|        |  |      | 407.9        | 8.4   |       |       |                     |
|        |  |      | 289.9        | 7.4   |       |       |                     |
|        |  |      | 451.7        | 7.0   |       |       |                     |
|        |  |      | 244.9        | 6.7   |       |       |                     |
|        |  |      | 272.9        | 6.5   |       |       |                     |

|        |  |      |                                                           |                                             |                                                    |                                               |                                          |
|--------|--|------|-----------------------------------------------------------|---------------------------------------------|----------------------------------------------------|-----------------------------------------------|------------------------------------------|
| 864,86 |  | 19,6 | 694.8<br>406.8<br>738.8<br>560.7<br>576.7                 | 100.0<br>95.5<br>72.8<br>40.9<br>38.3       |                                                    |                                               | procyanidin P3 type                      |
| 434,96 |  | 25,4 | <b>314.9</b><br>315.5<br>344.8                            | 100.0<br>11.7<br>10.3                       | 166.7<br>208.7<br>124.8<br>209.8                   | 100.0<br>45.9<br>6.0<br>5.2                   | (Epi)afzelechin (or phloretin) hexose    |
| 632,75 |  | 13,9 | <b>300.7</b><br>301.6<br>462.7                            | 100.0<br>13.2<br>4.0                        | 300.7<br>256.6<br>229.6<br>201.5                   | 100.0<br>89.3<br>49.1<br>41.1                 | HHDP galloyl hexose                      |
| 462,91 |  | 19,0 | <b>300.7</b><br>300.0<br>301.4                            | 100.0<br>30.5<br>8.1                        | 256.7<br>299.7<br>228.7<br>184.8<br>257.7<br>300.5 | 100.0<br>58.0<br>27.9<br>16.5<br>14.0<br>11.9 | ellagic acid hexose                      |
| 934,74 |  | 19,2 | <b>300.7</b><br>632.9<br>633.7<br>301.7<br>299.9<br>274.8 | 100.0<br>67.4<br>20.9<br>15.7<br>6.4<br>5.3 | 256.8<br>283.8                                     | 100.0<br>76.5                                 | ellagic acid d                           |
| 466,95 |  | 19,2 | <b>390.9</b><br>300.8                                     | 100.0<br>24.8                               | 300.7<br>274.8                                     | 100.0<br>64.1                                 | casuructin/potentillin like ellagitannin |

|        |  |      |              |       |       |       |                                          |
|--------|--|------|--------------|-------|-------|-------|------------------------------------------|
|        |  |      | 274.7        | 7.8   | 305.7 | 56.7  |                                          |
|        |  |      | 301.9        | 6.8   | 168.8 | 43.3  |                                          |
|        |  |      | 632.7        | 3.5   | 376.8 | 42.3  |                                          |
|        |  |      |              |       | 292.8 | 28.9  |                                          |
|        |  |      |              |       | 262.7 | 21.5  |                                          |
|        |  |      |              |       | 381.8 | 20.8  |                                          |
|        |  |      |              |       | 340.6 | 20.1  |                                          |
| 446,89 |  | 22,3 | <b>300.7</b> | 100.0 | 300.8 | 100.0 | ellagic acid desoxyhexoside (rhamnoside) |
|        |  |      | 300.1        | 16.4  | 299.7 | 93.2  |                                          |
|        |  |      | 301.6        | 14.5  | 256.7 | 55.5  |                                          |
|        |  |      |              |       | 257.8 | 29.0  |                                          |
| 432,89 |  | 22,5 | <b>300.7</b> | 100.0 | 299.7 | 100.0 | ellagic acid pentose                     |
|        |  |      | 299.8        | 61.2  | 228.6 | 14.9  |                                          |
|        |  |      | 301.7        | 17.5  | 184.8 | 11.2  |                                          |
|        |  |      |              |       | 256.5 | 7.8   |                                          |
| 466,90 |  | 23,4 | <b>300.8</b> | 100.0 | 256.7 | 100.0 | casuructin/potentillin like ellagitannin |
|        |  |      | 457.8        | 30.5  | 144.9 | 77.2  |                                          |
|        |  |      | 381.9        | 28.1  | 184.6 | 53.2  |                                          |
|        |  |      | 301.6        | 17.2  | 300.6 | 49.4  |                                          |
|        |  |      | 632.7        | 12.4  | 298.5 | 46.8  |                                          |
|        |  |      | 390.8        | 9.2   | 270.5 | 32.9  |                                          |
| 300,83 |  | 23,4 | <b>300.7</b> | 100.0 | 184.6 | 100.0 | ellagic acid                             |
|        |  |      | 256.7        | 34.8  |       |       |                                          |
|        |  |      | 228.8        | 27.8  |       |       |                                          |
|        |  |      | 200.7        | 9.5   |       |       |                                          |
|        |  |      | 257.7        | 8.3   |       |       |                                          |
|        |  |      | 184.7        | 8.0   |       |       |                                          |

|        |  |      |              |       |       |       |                                     |
|--------|--|------|--------------|-------|-------|-------|-------------------------------------|
|        |  |      | 283.7        | 7.5   |       |       |                                     |
|        |  |      | 258.7        | 6.6   |       |       |                                     |
|        |  |      | 299.8        | 6.6   |       |       |                                     |
|        |  |      | 254.7        | 5.8   |       |       |                                     |
| 933,94 |  | 23,8 | <b>896.8</b> | 100.0 | 744.7 | 100.0 | ellagic acid d                      |
|        |  |      | 1566.8       | 89.4  | 300.8 | 50.0  |                                     |
|        |  |      | 300.7        | 76.1  |       |       |                                     |
|        |  |      | 1567.5       | 44.6  |       |       |                                     |
|        |  |      | 1084.7       | 41.6  |       |       |                                     |
|        |  |      | 1264.7       | 41.1  |       |       |                                     |
|        |  |      | 1566.4       | 38.2  |       |       |                                     |
|        |  |      | 897.7        | 30.0  |       |       |                                     |
|        |  |      | 1568.6       | 26.4  |       |       |                                     |
|        |  |      | 898.7        | 21.7  |       |       |                                     |
| 446,89 |  | 12,5 | <b>400.8</b> | 100.0 | 268.8 | 100.0 | trihydroxyflavone O-pentose, fa     |
|        |  |      | 268.9        | 35.7  | 160.8 | 24.9  |                                     |
|        |  |      | 130.8        | 6.8   | 130.8 | 11.7  |                                     |
| 416,88 |  | 12,7 | 151.8        | 100.0 |       |       | kaempferol O -pentose               |
|        |  |      | 240.8        | 88.1  |       |       |                                     |
|        |  |      | 162.8        | 33.4  |       |       |                                     |
|        |  |      | 150.7        | 32.7  |       |       |                                     |
|        |  |      | 284.8        | 25.2  |       |       |                                     |
|        |  |      | 152.7        | 19.2  |       |       |                                     |
|        |  |      | 178.8        | 17.8  |       |       |                                     |
| 446,97 |  | 13,7 | <b>400.9</b> | 100.0 | 268.8 | 100.0 | trihydroxyflavone O-pentose, fa     |
|        |  |      | 313.1        | 6.0   | 160.7 | 62.9  |                                     |
| 460,99 |  | 15,4 | <b>414.9</b> | 100.0 | 268.8 | 100.0 | trihydroxyflavone-desoxyhexoside fa |

|        |        |      |              |       |       |       |                                  |
|--------|--------|------|--------------|-------|-------|-------|----------------------------------|
|        |        |      | 268.9        | 6.4   | 160.7 | 47.5  |                                  |
|        |        |      |              |       | 269.8 | 19.3  |                                  |
|        |        |      |              |       | 142.8 | 8.7   |                                  |
| 448,91 |        | 17,3 | <b>286.8</b> | 100.0 | 258.8 | 100.0 | tetrahydroxyflavanone O-hexoside |
|        |        |      | 258.9        | 69.7  |       |       |                                  |
|        |        |      | 268.8        | 50.0  |       |       |                                  |
|        |        |      | 259.8        | 11.0  |       |       |                                  |
|        |        |      | 287.8        | 10.7  |       |       |                                  |
|        |        |      | 269.8        | 9.9   |       |       |                                  |
|        |        |      | 242.9        | 5.4   |       |       |                                  |
| 432,94 |        | 19,3 | 270.7        | 100.0 |       |       | naringenin C-hexose              |
|        |        |      | 252.8        | 75.2  |       |       |                                  |
| 462,95 |        | 23,9 | <b>300.7</b> | 100.0 | 150.7 | 100.0 | quercetin -O-hexose              |
|        |        |      | 301.4        | 11.0  | 178.7 | 82.9  |                                  |
|        |        |      |              |       | 270.7 | 35.5  |                                  |
|        |        |      |              |       | 272.7 | 35.4  |                                  |
| 476,89 |        | 24,1 | <b>300.8</b> | 100.0 | 178.7 | 100.0 | quercetin O-glucuronide          |
|        |        |      | 301.7        | 14.4  | 150.7 | 86.4  |                                  |
| 446,90 |        | 27,2 | <b>284.6</b> | 100.0 | 254.7 | 100.0 | kaempferol O-hexose              |
|        |        |      | 283.9        | 66.4  | 255.8 | 51.6  |                                  |
|        |        |      | 254.8        | 21.7  | 226.7 | 43.2  |                                  |
|        |        |      | 326.8        | 12.3  | 228.8 | 40.1  |                                  |
|        |        |      | 285.6        | 10.7  |       |       |                                  |
|        | 463,00 | 27,7 | 287.0        | 100.0 |       |       | kaempferol-O-glucuronide         |
|        |        |      | 288.0        | 21.3  |       |       |                                  |
| 488,89 |        | 30,3 | <b>284.8</b> | 100.0 |       |       | kaempferol-O-acetyl hexose       |



|        |  |      |              |       |       |       |                             |
|--------|--|------|--------------|-------|-------|-------|-----------------------------|
|        |  |      | 285.5        | 21.1  |       |       |                             |
| 592,91 |  | 38,5 | 284.8        | 100.0 |       |       | kaempferol coumaroyl hexose |
|        |  |      | 285.7        | 17.2  |       |       |                             |
|        |  |      | 446.8        | 7.6   |       |       |                             |
| 463,01 |  | 31,8 | 417.0        | 100.0 | 160.8 | 100.0 | sesquiterpenoid hexose, fa  |
|        |  |      | 417.9        | 21.3  |       |       |                             |
|        |  |      | 415.0        | 15.7  |       |       |                             |
| 695,15 |  | 41,5 | <b>487.3</b> | 100.0 | 469.1 | 100.0 | triterpenoid hexose fa      |
|        |  |      | 649.0        | 16.1  | 470.0 | 34.0  |                             |
|        |  |      |              |       | 425.2 | 13.4  |                             |
|        |  |      |              |       | 407.0 | 7.1   |                             |
|        |  |      |              |       | 426.2 | 6.2   |                             |
|        |  |      |              |       | 442.9 | 5.1   |                             |

**Table S1.** Mass to charge ratio (m/z) in negative (-) and positive (+) ionization mode, retention time (rt, in minutes), fragmentation pattern (ms/ms and ms3 of the ms/ms fragment underlined in bold), relative intensity (I %) of the fragments, putative identification, based on comparison with authentic standards, comparison with public databases and comparison with literature (especially: Del Bubba et al.,2012, J. Mass Spectrom. 47, 1207–1220, Fait et al., 2008, Plant Physiol. 148, 730-750, Hanhineva et al., 2008, Phytochemistr 69, 2463–2481).

|                                          | OE  | C | S  | pq(corr)1 | ABA | C | NAA |
|------------------------------------------|-----|---|----|-----------|-----|---|-----|
| FaSHP expression                         | ++  | + | -  | 0,946209  |     |   |     |
| cinnamoyl O-hexose                       | +/- | + | -  | 0,930756  | ++  | + | -   |
| coumaric acid hexose                     | +/- | + | -  | 0,901673  | ++  | + | -   |
| dihydroxybenzoic acid derivative         | +   | + | -  | 0,597937  | ++  | + | -   |
| pelargonidin-3-O-acetylglucoside         | +/- | + | -  | 0,526407  | ++  | + | -   |
| pelargonidin-3-O-malonylglucoside        | +/- | + | -  | 0,521076  | ++  | + | -   |
| sinapic acid hexose                      | +   | + | ++ | -0,61096  | -   | + | ++  |
| dihydroxybenzoic acid hexose             | ++  | + | ++ | -0,63283  | -   | + | +/- |
| trihydroxyflavone-desoxyhexoside         | +   | + | +  | -0,633278 | +   | + | +   |
| coumaroyl quinic acid                    | ++  | + | ++ | -0,660334 | ++  | + | ++  |
| ellagic acid desoxyhexose                | +   | + | ++ | -0,673076 | -   | + | +   |
| casuructin/potentillin like ellagitannin | ++  | + | ++ | -0,679878 | -   | + | +   |
| Procyanidin tetramer                     | +/- | + | ++ | -0,681829 | -   | + | -   |
| casuructin/potentillin like ellagitannin | ++  | + | ++ | -0,716418 | -   | + | ++  |
| ellagic acid pentose                     | +   | + | +  | -0,731163 | -   | + | ++  |
| hydroxybenzoyl hexose                    | ++  | + | ++ | -0,740757 | -   | + | -   |
| ellagic acid derivative                  | +   | + | ++ | -0,751597 | -   | + | ++  |
| hdihydroxybenzoic acid hexose            | +/- | + | ++ | -0,756686 | -   | + | +/- |
| ferulic acid hexose derivative           | ++  | + | ++ | -0,756927 | ++  | + | ++  |
| caffeoyl quinic acid                     | ++  | + | ++ | -0,776746 | -   | + | ++  |
| kaempferol coumaroyl hexose              | ++  | + | ++ | -0,778017 | -   | + | ++  |
| trihydroxyflavone O-pentose              | +   | + | ++ | -0,790763 | -   | + | +/- |
| HHDP galloyl hexose                      | +   | + | ++ | -0,798734 | -   | + | +   |
| caffeic acid derivative                  | ++  | + | ++ | -0,80117  | -   | + | ++  |
| caffeic acid hexose                      | ++  | + | ++ | -0,802114 | -   | + | ++  |
| ellagic acid hexose                      | -   | + | ++ | -0,829421 | -   | + | ++  |
| ellagic acid                             | +/- | + | ++ | -0,839532 | -   | + | ++  |
| dihydroxybenzoic acid pentose            | -   | + | ++ | -0,845747 | -   | + | +/- |
| trihydroxyflavone O-pentose              | +   | + | ++ | -0,912101 | -   | + | +/- |

**Table S2.** pq(corr) loadings of OPLS analysis and comparison with metabolite levels in *FaSHP* up- and down- regulated fruits, and in fruits treated with hormones. + = level of metabolite in control fruits; +/- = slight variation (increase or decrease) compared to the control; ++ = increase of metabolite level compared with level in control fruits; - = decrease of metabolite level compared with level in control fruits. OE = *FaSHP* over-expressing fruits; S = *FaSHP* silenced fruits; C = control fruits; ABA, NAA = fruits treated with either ABA or NAA, 18 h after the beginning of the treatment.

| Gene                                                       | primer FW name  | primer FW sequence (5'-3') | primer RV name  | primer FW sequence (5'-3') | Genbank Ac. number |
|------------------------------------------------------------|-----------------|----------------------------|-----------------|----------------------------|--------------------|
| FaITS - Fragaria x ananassa internal transcribed spacer    | FaSHP_ITS_rtfor | CGTCACGCGGTTGGCATAAATAC    | FaSHP_ITS_rtrev | GACGCGCTCACGGCTAAGGAA      | FJ356167           |
| FaSHP - Fragaria x ananassa SHATTERPROOF                   | FaSHP_rtfor2    | GGCACAGCAGCAGCAAGCAAATA    | FaSHP_rtrev2    | CTTGGCGATTGTAATTGTGATTGG   | KC676787           |
| FaSHP - Fragaria x ananassa SHATTERPROOF                   | FaSHP_rtiRNAfor | TGGAGAAAGGGATCAGCAGAATAA   | FaSHP_rtiRNArev | TATGCTGCCAGGAACATCGTCCG    | KC676787           |
| FaPG1- Fragaria x ananassa polygalacturonase 1             | FaPG1_rtfor     | TCGGAAGTCTCGGAAGATACGACA   | FaPG1_rtrev     | CGAGGCGGTGGTAGCTTTAGGA     | AY282613           |
| FaPL - Fragaria x ananassa pectate lyase                   | FaPL_rtfor      | CCATATTCGGATCTAGCCACATTT   | FaPL_rtrev      | AGGAGTCACTATGCCCAACAGC     | U63550             |
| FaEG1 - Fragaria x ananassa endo-beta-1,4-glucanase 1      | FaEG1_rtfor1    | GCGTACAGCTCCAGCCTCAAAAA    | FaEG1_rtrev1    | ATTCTCTGTACTGCCCTTCTCG     | AJ00634            |
| FaCHS - Fragaria x ananassa chalcone synthase              | FaCHS_rtfor1    | GCCCGTCCGTCGTAAGCGTCTC     | FaCHS_rtrev1    | CTAGGCCACGGAAGGTCACG       | A1795154           |
| FaPAL6 - Fragaria x ananassa phenylalanine ammonia lyase 6 | FaPAL6_rtfor    | GACAAGGTGTTCAACGCAATCTGC   | FaPAL6_rtrev    | AATCAAACCAATTCAGCCAAAAG    | HM641823           |
| FaGalUR – Fragaria x ananassa galacturonate reductase      | FaGalUR_rtfor1  | TGCCCAAGCCAAAGGAAAATCAAC   | FaGalUR_rtrev1  | TCCTCCTCGGTCAAGCAGAAAGTCG  | AF139082           |
| FaQR – Fragaria x ananassa quinone oxidoreductase          | FaQR_rtfor1     | CCTTGGGTGCTGCTGATTTG       | FaQR_rtrev1     | GTGGCGTTGCTGGACCTACTATT    | AY048861           |
| FaMYB10 – Fragaria x ananassa MYB 10                       | FaMYB10_rtfor2  | TCCAAATAAGCCCATGAGAATAA    | FaMYB10_rtrev2  | CACCAAACAGCCAGCAGCAGAAT    | EU155162           |
| FaMYB1 – Fragaria x ananassa MYB 1                         | FaMYB1_rtfor1   | GCTGTTTGGTGCCTGAGTTGAATC   | FaMYB1_rtrev1   | TAAAAGAAGCCCCGAGAGGAA      | AF401220           |
| FaMads9 – Fragaria x ananassa MADS 9                       | FaMads9_rtfor1a | AGCCAACAGAGATTTGAAAACGAA   | FaMads9_rtrev1a | AGGCTGGAACATAAGTCCCTGTGT   | AF484683           |
| STAG1 – strawberry AGAMOUS 1                               | STAG1_rtfor     | CTGCCAAGCTGCATAACCAGATA    | STAG1_rtrev     | ATTCGCGCAAACAAGAGTTCATTC   | AF168468           |

**Table S3.** sequences of the forward (FW) and reverse (RV) oligonucleotides used in the real-time PCR experiments performed in this work. In the last column the GenBank accession numbers are reported.

| Sequence name               | Genbank Ac. number |
|-----------------------------|--------------------|
| Rosa rugosa MASAKOD1        | BAA90743.1         |
| Malus x domestica MADS14    | ADL36737.1         |
| Prunus persica PpPLE        | ACL31234.1         |
| Arabidopsis thaliana SHP1   | NP_191437.1        |
| Arabidopsis thaliana SHP2   | AAU82079           |
| Antirrhinium majus AmPLE    | AAB25101           |
| Petunia hybrida FBP6        | AAQ72516.1         |
| Solanum lycopersicum TAGL1  | NP001234187        |
| Rosa rugosa MASAKOC1        | BAA90744.1         |
| Malus x domestica MADS15    | CAC80858           |
| Fragaria x ananassa STAG1   | AAD45814           |
| Arabidopsis thaliana AG     | NP_567569          |
| Antirrhinium majus AmFAR    | CAB42988           |
| Petunia hybrida PMADS3      | CAA51417.1         |
| Solanum lycopersicum TAG1   | AAM33099           |
| Arabidopsis thaliana SEP1   | AAA32732           |
| Arabidopsis thaliana SEP2   | AAA32734           |
| Arabidopsis thaliana SEP3   | AAB67832           |
| Arabidopsis thaliana SEP4   | NP_973411.1        |
| Fragaria x ananassa FaMads9 | AAO49380.1         |
| Solanum lycopersicum RIN    | AAM15775.1         |
| Arabidopsis thaliana AP3    | NP_191002.1        |

**Table S4.** Genbank accession numbers of the MADS-box protein sequences used to construct the phylogenetic tree.
